# Supplementary material for: Effect of Oral Sodium Bicarbonate Treatment on 24-Hour Ambulatory Blood Pressure Measurements in Patients With Chronic Kidney Disease and Metabolic Acidosis
Source: PubMed Central journal article supplement (PMC8450526; doi:10.3389/fmed.2021.711034), 2021-09-06
Supplement: Table_1.pdf [file Table_1.pdf]

**Supplemental table 1. (A) Association of systolic and diastolic blood pressure change (mmHg) with respect to study group.**

|                                           | n  | Regression models |                   |             |                   |              |                   |
|-------------------------------------------|----|-------------------|-------------------|-------------|-------------------|--------------|-------------------|
|                                           |    | Crude             |                   | Adjusted Ib |                   | Adjusted IIb |                   |
|                                           |    | $\beta$           | 95% CI            | $\beta$     | 95% CI            | $\beta$      | 95% CI            |
| <b><math>\Delta</math> 24h-ABPM</b>       | 43 |                   |                   |             |                   |              |                   |
| <i>Systolic</i>                           |    | 2.522             | -2.364 to 7.408   | 2.497       | -2.488 to 7.482   | 1.769        | -3.414 to 6.952   |
| <i>Diastolic</i>                          |    | 0.868             | -2.411 to 4.147   | 0.804       | -2.533 to 4.16    | 1.04         | -2.485 to 4.565   |
| <b><math>\Delta</math> Daytime-ABPM</b>   | 43 |                   |                   |             |                   |              |                   |
| <i>Systolic</i>                           |    | 1.816             | -3.411 to 7.042   | 1.808       | -3.515 to 7.132   | 1.25         | -4.32 to 6.821    |
| <i>Diastolic</i>                          |    | 0.976             | -2.437 to 4.388   | 0.856       | -2.621 to 4.332   | 0.949        | -2.711 to 4.61    |
| <b><math>\Delta</math> Nighttime-ABPM</b> | 37 |                   |                   |             |                   |              |                   |
| <i>Systolic</i>                           |    | 4.231             | -1.069 to 9.531   | 4.077       | -1.416 to 9.57    | 3.895        | -1.807 to 9.598   |
| <i>Diastolic</i>                          |    | 1.470             | -2.069 to 5.009   | 1.467       | -1.959 to 4.894   | 1.824        | -1.691 to 5.339   |
| <b><math>\Delta</math> Office BP</b>      | 45 |                   |                   |             |                   |              |                   |
| <i>Systolic</i>                           |    | -7.289            | -16.203 to 1.626  | -7.447      | -16.655 to 1.761  | -8.141       | -17.833 to 1.327  |
| <i>Diastolic</i>                          |    | -8.19             | -13.375 to -3.004 | -8.355      | -13.679 to -3.031 | -8.97        | -14.308 to -3.091 |

Crude= intervention group (target HCO<sub>3</sub><sup>-</sup> 24±1 mmol/L) vs. rescue group (reference; group (target HCO<sub>3</sub><sup>-</sup> 20±1 mmol/L); Adjusted Ib = Crude + change of eGFR from baseline to week 8 (mL/min per 1.73m<sup>2</sup>) + age (years)  
Adjusted IIb= Adjusted I + use of diuretics.  
24h-ABPM, 24 hours ambulatory blood pressure monitoring; Daytime ABPM, from 8:00 until 22:00 ambulatory blood pressure monitoring; Nighttime ABPM, from 22:01 until 7:59 ambulatory blood pressure monitoring; Office BP, office blood pressure measurement;  $\beta$  = point estimate (mmHg); 95% CI, 95 % confidence interval.

**Supplemental table 1. (B) Association of systolic and diastolic blood pressure change (mmHg) with respect to sodium bicarbonate dose (mg/kg body weight).**

|                                           | n  | Regression models |                 |             |                 |              |                 |
|-------------------------------------------|----|-------------------|-----------------|-------------|-----------------|--------------|-----------------|
|                                           |    | Crude             |                 | Adjusted Ib |                 | Adjusted IIb |                 |
|                                           |    | $\beta$           | 95% CI          | $\beta$     | 95% CI          | $\beta$      | 95% CI          |
| <b><math>\Delta</math> 24h-ABPM</b>       | 43 |                   |                 |             |                 |              |                 |
| <i>Systolic</i>                           |    | 0.047             | -0.022 to 0.116 | 0.049       | -0.022 to 0.119 | 0.041        | -0.031 to 0.113 |
| <i>Diastolic</i>                          |    | 0.021             | -0.026 to 0.068 | 0.022       | -0.025 to 0.07  | 0.025        | -0.024 to 0.073 |
| <b><math>\Delta</math> Daytime-ABPM</b>   | 43 |                   |                 |             |                 |              |                 |
| <i>Systolic</i>                           |    | 0.046             | -0.028 to 0.119 | 0.047       | -0.03 to 0.122  | 0.042        | -0.035 to 0.119 |
| <i>Diastolic</i>                          |    | 0.013             | -0.036 to 0.062 | 0.014       | -0.035 to 0.064 | 0.015        | -0.036 to 0.067 |
| <b><math>\Delta</math> Nighttime-ABPM</b> | 37 |                   |                 |             |                 |              |                 |
| <i>Systolic</i>                           |    | 0.044             | -0.037 to 0.124 | 0.044       | -0.038 to 0.127 | 0.042        | -0.042 to 0.126 |
| <i>Diastolic</i>                          |    | 0.026             | -0.027 to 0.079 | 0.025       | -0.025 to 0.076 | 0.028        | -0.023 to 0.079 |
| <b><math>\Delta</math> Office BP</b>      | 45 |                   |                 |             |                 |              |                 |
| <i>Systolic</i>                           |    | -0.024            | -0.161 to 0.112 | -0.024      | -0.164 to 0.115 | -0.026       | -0.171 to 0.119 |
| <i>Diastolic</i>                          |    | -0.067            | -0.15 to 0.016  | -0.067      | -0.152 to 0.018 | -0.066       | -0.157 to 0.022 |

Crude= sodium bicarbonate dose (mg /kg body weight);  
Adjusted Ib = Crude + change of eGFR from baseline to week 8 (mL/min per 1.73m<sup>2</sup>) + age (years);  
Adjusted IIb= Adjusted I + use of diuretics.  
24h-ABPM, 24 hours ambulatory blood pressure monitoring; Daytime ABPM, from 8:00 until 22:00 ambulatory blood pressure monitoring; Nighttime ABPM, from 22:01 until 7:59 ambulatory blood pressure monitoring; Office BP, office blood pressure measurement;  $\beta$  = point estimate (mmHg); 95% CI, 95 % confidence interval
